# Supplementary material for: Chemical Characterization and Bioaccessibility of Bioactive Compounds from Saponin-Rich Extracts and Their Acid-Hydrolysates Obtained from Fenugreek and Quinoa
Source: PubMed Central journal article supplement (PMC7555840; doi:10.3390/foods9091159), 2020-08-21

**Supplementary material**

**Figure S1.** A) HPLC-DAD chromatogram showing the identified saponins in FE and B) GC-MS chromatogram showing the identified sapogenins in HFE.

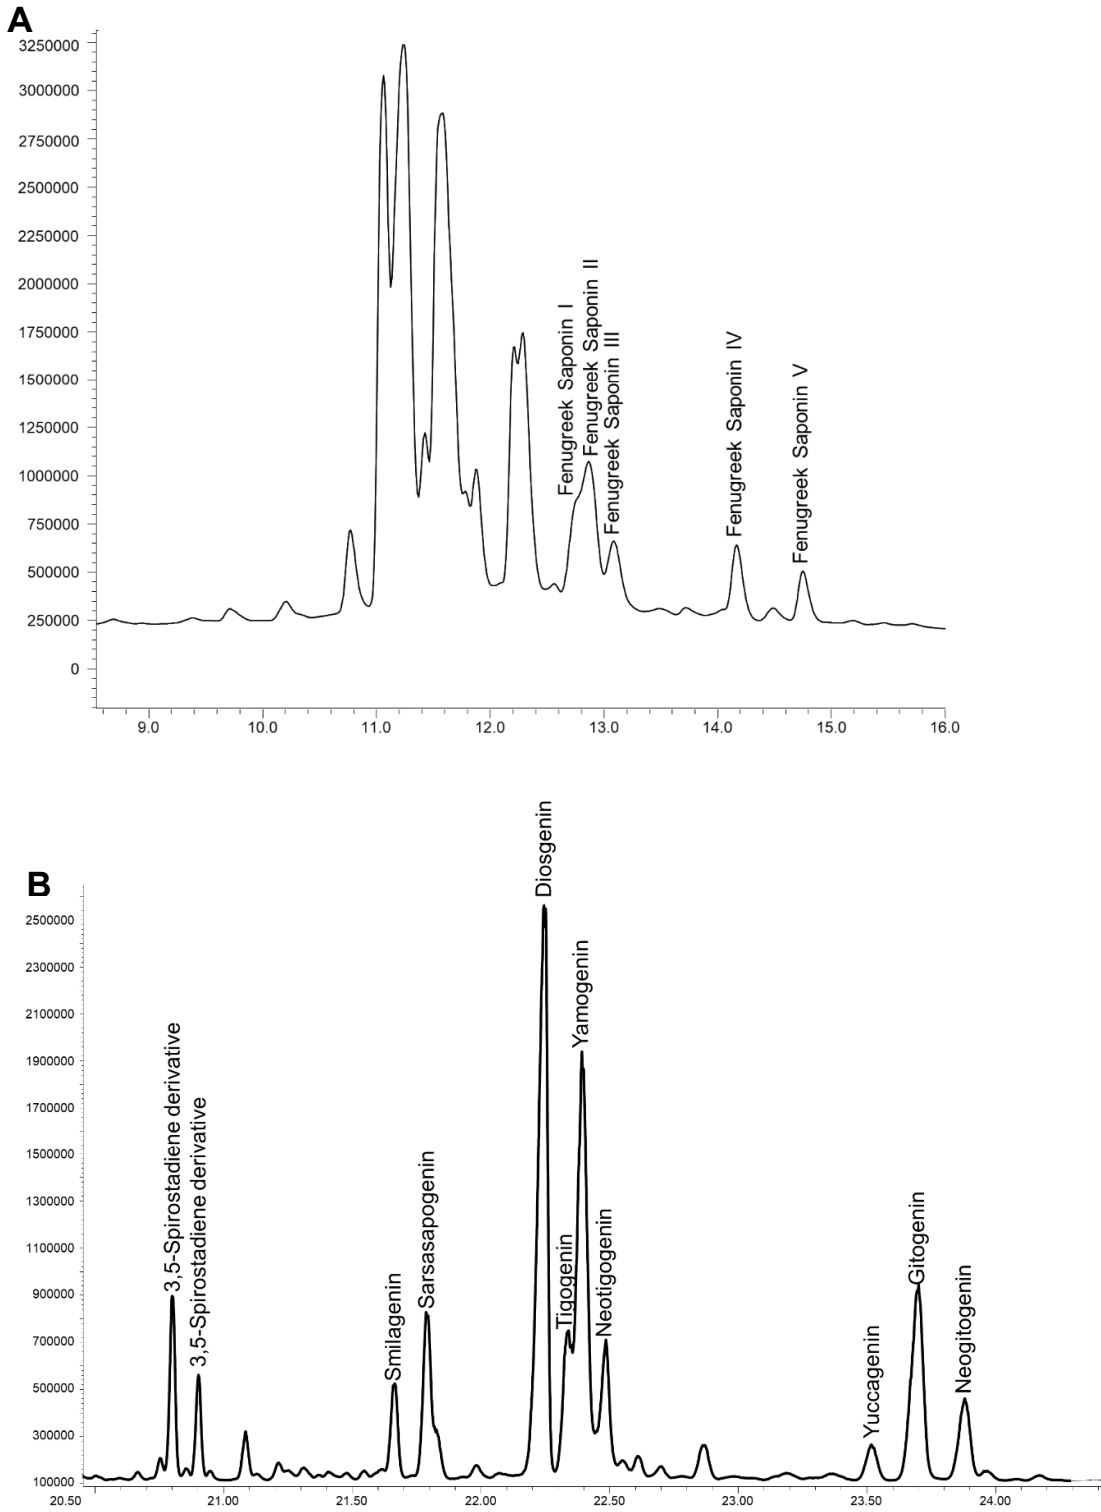

**Figure S2.** A) HPLC-DAD chromatogram showing the identified saponins in QE and B) GC-MS chromatogram showing the identified sapogenins in HQE.

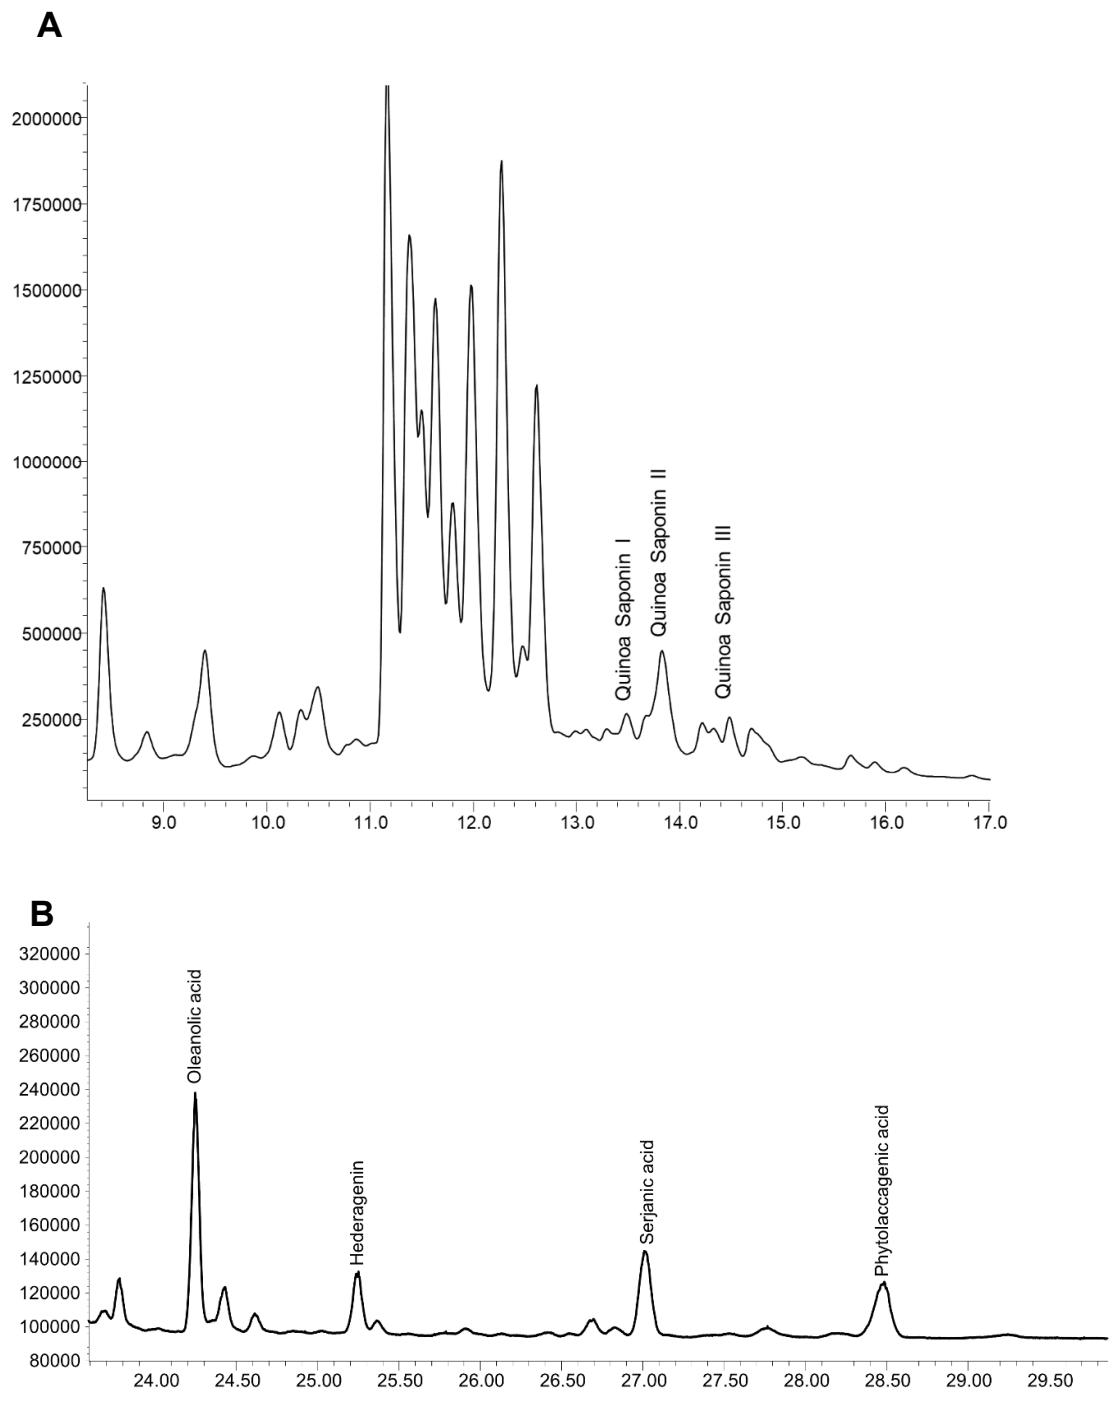

Supplement: foods-09-01159-s001.pdf [file foods-09-01159-s001.pdf]
